# Supplementary material
Source: publisher site journal article supplement (https://www.dovepress.com/article/470821)
Supplement: Supplementary file 1 [file get_supplementary_file.php]

**Supplementary Table 1. Machine Learning Model Parameters for Predicting CRKP and CoRKP Resistance**

| **Model** | **Parameter** | **CRKP Models** | **CoRKP Models** |
| --- | --- | --- | --- |
| **RFC** | n_estimators | 300 | 100 |
| max_depth | 20 | 20 |
| min_samples_split | 2 | 2 |
| min_samples_leaf | 2 | 1 |
| max_features | sqrt | sqrt |
| bootstrap | False | False |
| **GBC** | n_estimators | 300 | 100 |
| max_depth | 7 | 5 |
| min_samples_split | 4 | 6 |
| learning_rate | 0.1 | 0.2 |
| subsample | 0.6 | 0.8 |
| **XGBoost** | n_estimators | 300 | 200 |
| max_depth | 7 | 5 |
| learning_rate | 0.1 | 0.05 |
| colsample_bytree | 0.8 | 0.6 |
| subsample | 0.6 | 0.8 |
| **LGBM** | n_estimators | 100 | 300 |
| max_depth | 15 | 5 |
| learning_rate | 0.05 | 0.05 |
| num_leaves | 70 | 31 |
| **AdaBoost** | n_estimators | 200 | 200 |
| max_depth | 3 | 3 |
| learning_rate | 1 | 1 |
| base_estimator | DecisionTreeClassifier | DecisionTreeClassifier |
| **LR** | max_iter | 300 | 200 |
| penalty | l2 | l1 |
| C | 0.1 | 10 |
| solver | liblinear | liblinear |
| class_weight | None | None |
| **LDA** | solver | lsqr | lsqr |
| shrinkage | None | None |
| **SVM** | random_state | 42 | 42 |
|  | probability | true | true |

Abbreviations: CoRKP, colistin-resistant *Klebsiella pneumoniae*; CRKP, carbapenem-resistant *Klebsiella pneumoniae*; GBC, gradient boosting classifier; LDA, linear discriminant analysis; LGBM, light gradient boosting machine; LR, logistic regression; RFC, random forest classifier; SVM, support vector machine
